# Supplementary material for: Additive effects of alkali metals on Cu-modified CH3NH3PbI3−δClδphotovoltaic devices
Source: Royal Society of Chemistry journal article supplement (doi:10.1039/c9ra03068a), 2019-01-01
Supplement: c9ra03068a1.pdf [file c9ra03068a1.pdf]

## Supplementary information

### Additive effects of alkali metals on Cu-modified CH<sub>3</sub>NH<sub>3</sub>PbI<sub>3-δ</sub>Cl<sub>δ</sub> photovoltaic devices

Naoki Ueoka, Takeo Oku, and Atsushi Suzuki

**Table S1.** Preparation composition of the present perovskite crystals.

| Cells                     | CH <sub>3</sub> NH <sub>3</sub> I | PbI <sub>2</sub> | PbI <sub>2</sub> | CuBr <sub>2</sub> | NaI     | KI      | RbI     | CsI     |
|---------------------------|-----------------------------------|------------------|------------------|-------------------|---------|---------|---------|---------|
| Standard                  | 2.4 M                             | 0.8 M            | 0.08 M           |                   |         |         |         |         |
| + CuBr <sub>2</sub>       | 2.4 M                             | 0.792 M          | 0.08 M           | 0.008 M           |         |         |         |         |
| + CuBr <sub>2</sub> + NaI | 2.376 M                           | 0.792 M          | 0.08 M           | 0.008 M           | 0.008 M |         |         |         |
| + CuBr <sub>2</sub> + KI  | 2.376 M                           | 0.792 M          | 0.08 M           | 0.008 M           |         | 0.008 M |         |         |
| + CuBr <sub>2</sub> + RbI | 2.376 M                           | 0.792 M          | 0.08 M           | 0.008 M           |         |         | 0.008 M |         |
| + CuBr <sub>2</sub> + CsI | 2.376 M                           | 0.792 M          | 0.08 M           | 0.008 M           |         |         |         | 0.008 M |

**Table S2.** Energy levels of the HOMO and LUMO, and energy gap ( $E_g$ ) of the perovskite structures without Cu, calculated by first-principles calculation.

| Perovskite             | LUMO (eV) | HOMO (eV) | $E_g$ (eV) | $E_F$ (eV) |
|------------------------|-----------|-----------|------------|------------|
| MAPbI <sub>3</sub>     | -14.9     | -17.6     | 2.70       | -16.2      |
| MA(Na)PbI <sub>3</sub> | -14.9     | -17.6     | 2.71       | -16.2      |
| MA(K)PbI <sub>3</sub>  | -14.9     | -17.6     | 2.71       | -16.2      |
| MA(Rb)PbI <sub>3</sub> | -14.9     | -17.6     | 2.71       | -16.2      |
| MA(Cs)PbI <sub>3</sub> | -14.9     | -17.6     | 2.71       | -16.2      |

**Table S3.** Calculated thermodynamic parameters of the perovskite structures without Cu. ( $G$ : Gibbs energy,  $H$ : enthalpy and  $S$ : entropy.)

| Perovskite             | $G$ (kJ mol <sup>-1</sup> ) | $H$ (kJ mol <sup>-1</sup> ) | $S$ (kJ K <sup>-1</sup> mol <sup>-1</sup> ) |
|------------------------|-----------------------------|-----------------------------|---------------------------------------------|
| MAPbI <sub>3</sub>     | 946                         | 2326                        | 4.63                                        |
| MA(Na)PbI <sub>3</sub> | 728                         | 2092                        | 4.58                                        |
| MA(K)PbI <sub>3</sub>  | 741                         | 2090                        | 4.53                                        |
| MA(Rb)PbI <sub>3</sub> | 721                         | 2094                        | 4.61                                        |
| MA(Vs)PbI <sub>3</sub> | 722                         | 2097                        | 4.61                                        |

## Supplementary information

**Table S4.** Measured photovoltaic parameters of the present perovskite photovoltaic devices.

|                           | $J_{sc}$ (mA cm <sup>-2</sup> ) | $V_{oc}$ (V) | FF    | $\eta$ (%) | $\eta_{ave}$ (%) | $R_s$ ( $\Omega$ cm <sup>2</sup> ) | $R_{sh}$ ( $\Omega$ cm <sup>2</sup> ) |
|---------------------------|---------------------------------|--------------|-------|------------|------------------|------------------------------------|---------------------------------------|
| After 1 week              |                                 |              |       |            |                  |                                    |                                       |
| Standard                  | 17.5                            | 0.713        | 0.601 | 7.5        | 6.9              | 3.62                               | 3788                                  |
| + CuBr <sub>2</sub>       | 20.6                            | 0.892        | 0.580 | 10.7       | 10.3             | 5.12                               | 1344                                  |
| + CuBr <sub>2</sub> + NaI | 21.6                            | 0.882        | 0.653 | 12.5       | 12.0             | 4.83                               | 2440                                  |
| + CuBr <sub>2</sub> + KI  | 21.6                            | 0.878        | 0.676 | 12.8       | 12.1             | 4.88                               | 2200                                  |
| + CuBr <sub>2</sub> + RbI | 22.1                            | 0.900        | 0.625 | 12.5       | 12.0             | 5.10                               | 1980                                  |
| + CuBr <sub>2</sub> + CsI | 21.4                            | 0.863        | 0.701 | 13.0       | 12.6             | 4.44                               | 2540                                  |
| After 2 weeks             |                                 |              |       |            |                  |                                    |                                       |
| Standard                  | 18.8                            | 0.734        | 0.562 | 7.8        | 6.8              | 4.49                               | 674                                   |
| + CuBr <sub>2</sub>       | 21.1                            | 0.917        | 0.622 | 12.0       | 11.2             | 5.42                               | 1926                                  |
| + CuBr <sub>2</sub> + NaI | 21.7                            | 0.893        | 0.671 | 13.0       | 12.4             | 4.44                               | 1810                                  |
| + CuBr <sub>2</sub> + KI  | 20.6                            | 0.891        | 0.681 | 12.5       | 12.1             | 4.97                               | 1485                                  |
| + CuBr <sub>2</sub> + RbI | 22.3                            | 0.925        | 0.637 | 13.1       | 12.3             | 5.23                               | 7785                                  |
| + CuBr <sub>2</sub> + CsI | 21.0                            | 0.883        | 0.695 | 12.9       | 12.6             | 4.81                               | 1534                                  |
| After 3 weeks             |                                 |              |       |            |                  |                                    |                                       |
| Standard                  | 17.5                            | 0.787        | 0.622 | 8.6        | 8.1              | 3.89                               | 20222                                 |
| + CuBr <sub>2</sub>       | 20.6                            | 0.928        | 0.652 | 12.5       | 11.5             | 4.65                               | 4317                                  |
| + CuBr <sub>2</sub> + NaI | 21.5                            | 0.887        | 0.681 | 13.0       | 12.4             | 4.34                               | 1803                                  |
| + CuBr <sub>2</sub> + KI  | 21.2                            | 0.884        | 0.685 | 12.8       | 11.8             | 4.58                               | 1230                                  |
| + CuBr <sub>2</sub> + RbI | 21.6                            | 0.910        | 0.673 | 13.2       | 12.4             | 5.10                               | 2224                                  |
| + CuBr <sub>2</sub> + CsI | 20.2                            | 0.860        | 0.708 | 12.3       | 11.8             | 4.42                               | 1067                                  |
| After 4 weeks             |                                 |              |       |            |                  |                                    |                                       |
| Standard                  | 18.0                            | 0.706        | 0.573 | 7.3        | 6.9              | 4.34                               | 22089                                 |
| + CuBr <sub>2</sub>       | 20.2                            | 0.930        | 0.679 | 12.7       | 11.9             | 4.79                               | 5675                                  |
| + CuBr <sub>2</sub> + NaI | 19.3                            | 0.887        | 0.691 | 11.8       | 11.6             | 4.66                               | 1361                                  |
| + CuBr <sub>2</sub> + KI  | 20.8                            | 0.890        | 0.691 | 12.8       | 11.6             | 4.55                               | 654                                   |
| + CuBr <sub>2</sub> + RbI | 21.8                            | 0.925        | 0.682 | 13.7       | 12.8             | 4.77                               | 1814                                  |
| + CuBr <sub>2</sub> + CsI | 20.8                            | 0.879        | 0.707 | 13.0       | 12.6             | 4.29                               | 891                                   |
| After 5 weeks             |                                 |              |       |            |                  |                                    |                                       |
| Standard                  | 17.0                            | 0.722        | 0.578 | 7.1        | 6.8              | 4.48                               | 18415                                 |
| + CuBr <sub>2</sub>       | 20.7                            | 0.940        | 0.679 | 13.2       | 11.5             | 4.71                               | 18738                                 |
| + CuBr <sub>2</sub> + NaI | 21.8                            | 0.894        | 0.684 | 13.3       | 12.8             | 4.54                               | 1426                                  |
| + CuBr <sub>2</sub> + KI  | 20.9                            | 0.887        | 0.679 | 12.6       | 11.7             | 4.85                               | 1325                                  |
| + CuBr <sub>2</sub> + RbI | 22.0                            | 0.918        | 0.690 | 13.9       | 13.3             | 4.86                               | 10343                                 |
| + CuBr <sub>2</sub> + CsI | 20.7                            | 0.868        | 0.713 | 12.8       | 12.4             | 4.28                               | 1017                                  |
| After 6 weeks             |                                 |              |       |            |                  |                                    |                                       |
| Standard                  | 17.9                            | 0.726        | 0.559 | 7.3        | 6.9              | 4.87                               | 1733                                  |
| + CuBr <sub>2</sub>       | 21.3                            | 0.940        | 0.662 | 13.3       | 12.1             | 5.32                               | 12829                                 |
| + CuBr <sub>2</sub> + NaI | 20.3                            | 0.912        | 0.683 | 12.6       | 12.3             | 4.85                               | 691                                   |
| + CuBr <sub>2</sub> + KI  | 20.6                            | 0.907        | 0.689 | 12.9       | 11.8             | 4.45                               | 506                                   |
| + CuBr <sub>2</sub> + RbI | 21.0                            | 0.921        | 0.690 | 13.3       | 13.3             | 5.07                               | 1426                                  |
| + CuBr <sub>2</sub> + CsI | 21.0                            | 0.892        | 0.712 | 13.3       | 12.8             | 4.05                               | 723                                   |
| After 7 weeks             |                                 |              |       |            |                  |                                    |                                       |
| Standard                  | 17.4                            | 0.711        | 0.543 | 6.7        | 6.1              | 5.04                               | 812                                   |
| + CuBr <sub>2</sub>       | 20.2                            | 0.946        | 0.682 | 13.0       | 12.1             | 4.90                               | 5476                                  |
| + CuBr <sub>2</sub> + NaI | 21.2                            | 0.918        | 0.678 | 13.2       | 12.1             | 4.71                               | 972                                   |
| + CuBr <sub>2</sub> + KI  | 20.3                            | 0.909        | 0.688 | 12.7       | 11.4             | 4.85                               | 894                                   |
| + CuBr <sub>2</sub> + RbI | 21.7                            | 0.937        | 0.688 | 14.0       | 13.0             | 4.93                               | 4077                                  |
| + CuBr <sub>2</sub> + CsI | 19.5                            | 0.906        | 0.699 | 12.4       | 11.7             | 4.50                               | 820                                   |

## Supplementary information

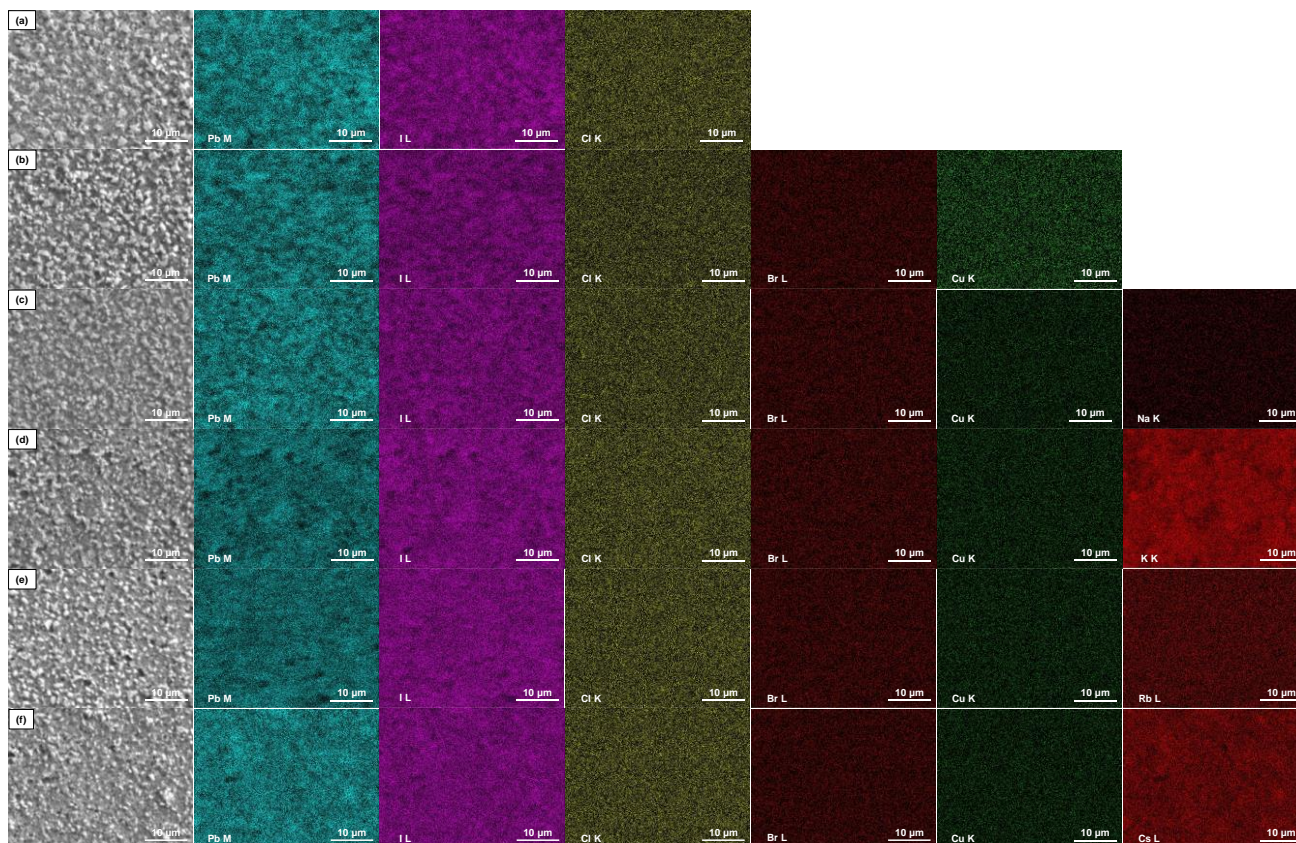

**Fig. S1.** SEM images and corresponding elemental mappings of the Pb M, I L, Cl K, Br L, Na K, K K, Rb L, and Cs L lines of (a) standard, (b) + CuBr<sub>2</sub>, (c) + CuBr<sub>2</sub> + NaI, (d) + CuBr<sub>2</sub> + KI, (e) + CuBr<sub>2</sub> + RbI and (f) + CuBr<sub>2</sub> + CsI perovskite photovoltaic devices.

## Supplementary information

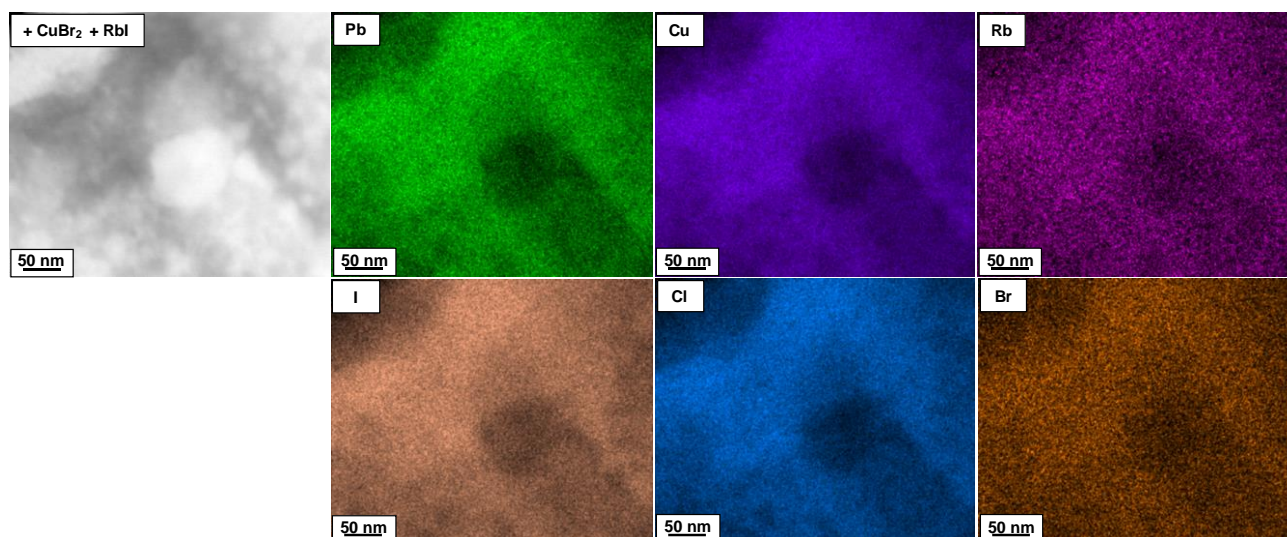

**Fig. S2.** High-angle annular dark-field scanning transmission electron microscopy image and corresponding elemental mappings of the Pb L, Cu K, Rb K, I K, Cl K, and Br K lines of + CuBr<sub>2</sub> + RbI perovskite photovoltaic device.

## Supplementary information

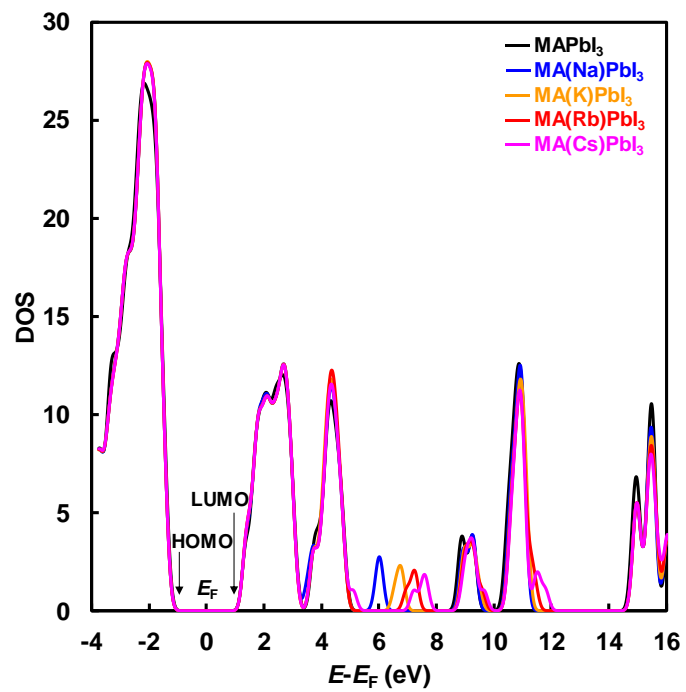

**Fig. S3.** Total density of states of the present perovskite structures without Cu.

## Supplementary information

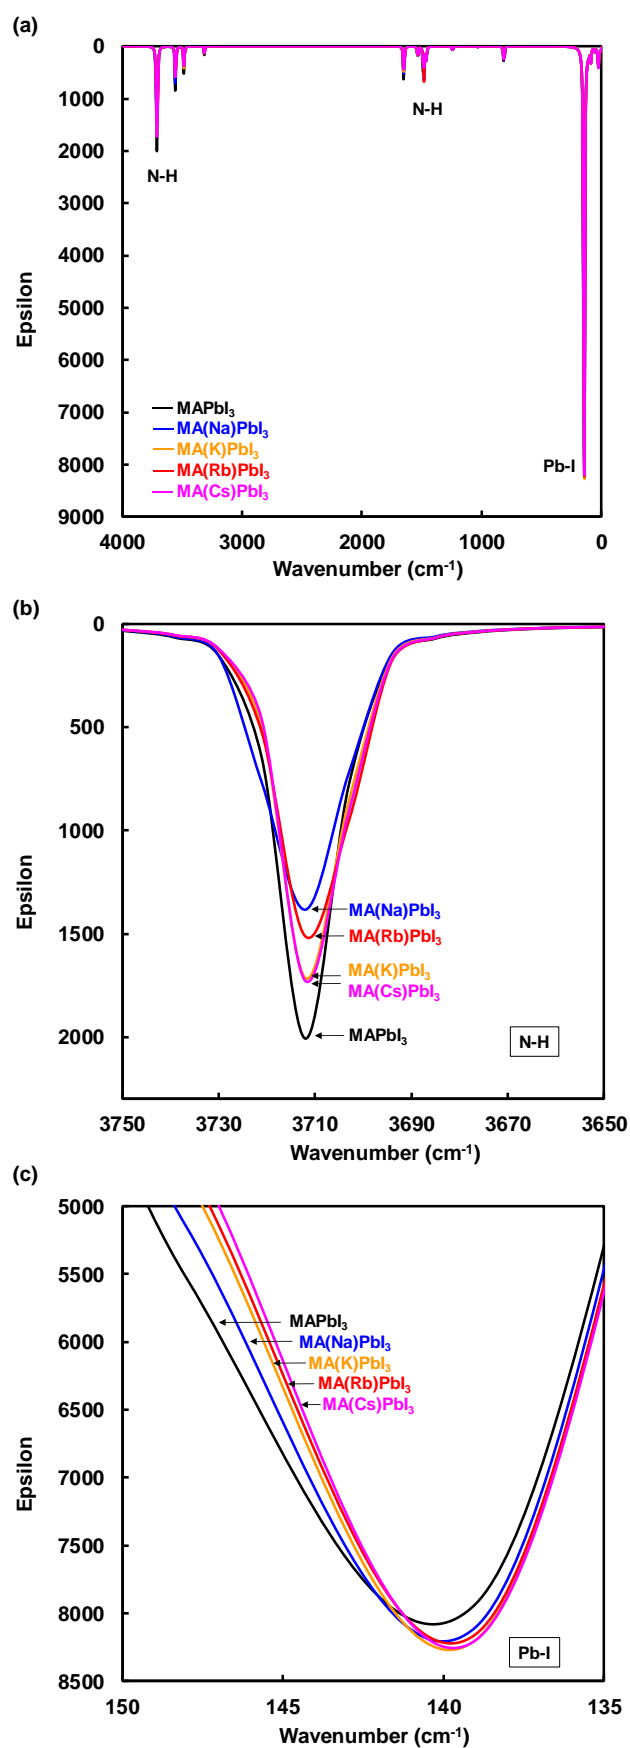

Fig. S4. IR spectra of (a) total view, (b) N-H, and (c) Pb-I stretching vibration of the perovskite structures without Cu.

# Supplementary information

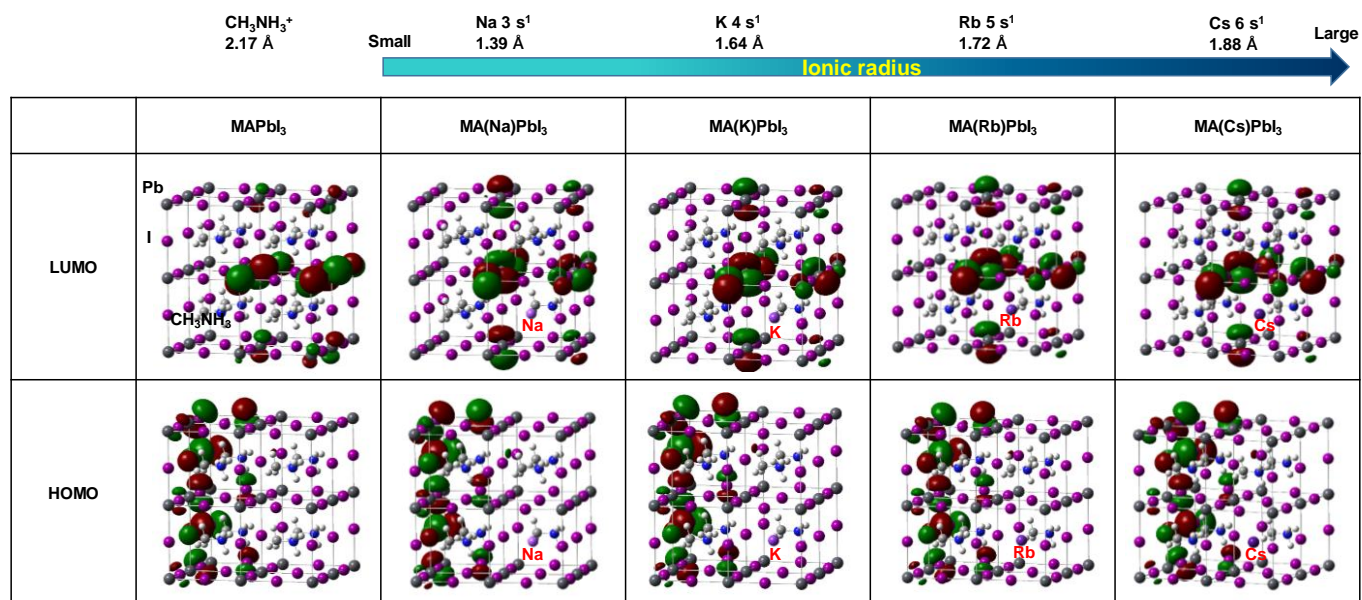

Fig. S5. Electronic structures at HOMO and LUMO of the present perovskite structures without Cu.
